# Supplementary material
Source: ML conference proceedings conference paper supplement (https://proceedings.neurips.cc/paper_files/paper/2022/hash/40cf260d0c2df13e4286cc0fc0972618-Abstract.html)
Supplement: Supplementary file 1 [file 40cf260d0c2df13e4286cc0fc0972618-Supplemental-Conference.pdf]

## Appendix: Tables of Numerical Experiment Results

Table 1: Results for order-3 nonnegative tensors with  $n = 500$  samples

| Tensor Size                 | BCG with Weak Oracle        |                   | Alternating Least Squares |                   |
|-----------------------------|-----------------------------|-------------------|---------------------------|-------------------|
|                             | NMSE                        | Time (s)          | NMSE                      | Time (s)          |
| $10 \times 10 \times 10$    | $0.004 \pm 0.001$           | $4.29 \pm 0.194$  | $0.058 \pm 0.002$         | $0.122 \pm 0.003$ |
| $20 \times 20 \times 20$    | $0.070 \pm 0.003$           | $28.6 \pm 0.753$  | $0.174 \pm 0.005$         | $0.351 \pm 0.012$ |
| $30 \times 30 \times 30$    | $0.220 \pm 0.004$           | $11.0 \pm 0.671$  | $0.287 \pm 0.005$         | $0.796 \pm 0.030$ |
| $40 \times 40 \times 40$    | $0.300 \pm 0.004$           | $5.83 \pm 0.202$  | $0.351 \pm 0.005$         | $0.947 \pm 0.043$ |
| $50 \times 50 \times 50$    | $0.371 \pm 0.004$           | $4.86 \pm 0.090$  | $0.406 \pm 0.006$         | $1.58 \pm 0.093$  |
| $60 \times 60 \times 60$    | $0.434 \pm 0.004$           | $4.78 \pm 0.063$  | $0.454 \pm 0.006$         | $2.08 \pm 0.105$  |
| $70 \times 70 \times 70$    | $0.500 \pm 0.004$           | $4.94 \pm 0.063$  | $0.503 \pm 0.008$         | $3.30 \pm 0.140$  |
| $80 \times 80 \times 80$    | $0.554 \pm 0.004$           | $5.73 \pm 0.112$  | $0.539 \pm 0.010$         | $5.96 \pm 0.226$  |
| $90 \times 90 \times 90$    | $0.594 \pm 0.004$           | $5.34 \pm 0.077$  | $0.576 \pm 0.011$         | $9.34 \pm 0.302$  |
| $100 \times 100 \times 100$ | $0.641 \pm 0.004$           | $5.56 \pm 0.072$  | $0.666 \pm 0.013$         | $16.8 \pm 0.568$  |
| Tensor Size                 | Simple Low Rank TC (SiLRTC) |                   | Trace Norm & ADMM (TNCP)  |                   |
|                             | NMSE                        | Time (s)          | NMSE                      | Time (s)          |
| $10 \times 10 \times 10$    | $0.609 \pm 0.002$           | $0.004 \pm 0.000$ | $0.290 \pm 0.004$         | $0.003 \pm 0.000$ |
| $20 \times 20 \times 20$    | $0.939 \pm 0.000$           | $0.007 \pm 0.000$ | $0.454 \pm 0.005$         | $0.002 \pm 0.000$ |
| $30 \times 30 \times 30$    | $0.981 \pm 0.000$           | $0.019 \pm 0.000$ | $0.476 \pm 0.004$         | $0.003 \pm 0.000$ |
| $40 \times 40 \times 40$    | $0.992 \pm 0.000$           | $0.043 \pm 0.000$ | $0.468 \pm 0.004$         | $0.004 \pm 0.000$ |
| $50 \times 50 \times 50$    | $0.996 \pm 0.000$           | $0.095 \pm 0.001$ | $0.481 \pm 0.004$         | $0.006 \pm 0.000$ |
| $60 \times 60 \times 60$    | $0.998 \pm 0.000$           | $0.190 \pm 0.002$ | $0.474 \pm 0.004$         | $0.010 \pm 0.000$ |
| $70 \times 70 \times 70$    | $0.999 \pm 0.000$           | $0.456 \pm 0.003$ | $0.477 \pm 0.003$         | $0.014 \pm 0.000$ |
| $80 \times 80 \times 80$    | $0.999 \pm 0.000$           | $0.918 \pm 0.008$ | $0.477 \pm 0.003$         | $0.020 \pm 0.000$ |
| $90 \times 90 \times 90$    | $0.999 \pm 0.000$           | $1.91 \pm 0.032$  | $0.481 \pm 0.003$         | $0.040 \pm 0.001$ |
| $100 \times 100 \times 100$ | $0.999 \pm 0.000$           | $2.83 \pm 0.050$  | $0.482 \pm 0.003$         | $0.050 \pm 0.001$ |

Table 2: Results for increasing order nonnegative tensors and  $n = 10,000$  samples

| Tensor Size     | BCG with Weak Oracle        |                   | Alternating Least Squares |                   |
|-----------------|-----------------------------|-------------------|---------------------------|-------------------|
|                 | NMSE                        | Time (s)          | NMSE                      | Time (s)          |
| $10^{\times 4}$ | $0.001 \pm 0.000$           | $25.2 \pm 1.11$   | $0.007 \pm 0.001$         | $0.925 \pm 0.025$ |
| $10^{\times 5}$ | $0.002 \pm 0.000$           | $40.7 \pm 0.82$   | $0.074 \pm 0.006$         | $1.13 \pm 0.038$  |
| $10^{\times 6}$ | $0.008 \pm 0.001$           | $59.5 \pm 1.20$   | $0.412 \pm 0.025$         | $1.79 \pm 0.097$  |
| $10^{\times 7}$ | $0.034 \pm 0.004$           | $530 \pm 368$     | $0.930 \pm 0.019$         | $1.28 \pm 0.050$  |
| $10^{\times 8}$ | $0.156 \pm 0.014$           | $872 \pm 66$      | $0.986 \pm 0.010$         | $15.1 \pm 0.199$  |
| Tensor Size     | Simple Low Rank TC (SiLRTC) |                   | Trace Norm & ADMM (TNCP)  |                   |
|                 | NMSE                        | Time (s)          | NMSE                      | Time (s)          |
| $10^{\times 4}$ | $0.149 \pm 0.004$           | $0.017 \pm 0.001$ | $0.236 \pm 0.002$         | $0.004 \pm 0.000$ |
| $10^{\times 5}$ | $0.870 \pm 0.002$           | $0.122 \pm 0.005$ | $0.728 \pm 0.004$         | $0.014 \pm 0.000$ |
| $10^{\times 6}$ | $0.990 \pm 0.000$           | $1.59 \pm 0.053$  | $0.883 \pm 0.003$         | $0.261 \pm 0.000$ |
| $10^{\times 7}$ | $0.999 \pm 0.000$           | $40 \pm 1.23$     | $0.943 \pm 0.002$         | $5.71 \pm 0.010$  |
| $10^{\times 8}$ | *                           | *                 | *                         | *                 |

The \* symbol indicates that the algorithm was unable to run for the given tensor size.

Table 3: Results for nonnegative tensors with size  $10^{6}$  and increasing  $n$  samples

| Sample Percent       | BCG with Weak Oracle        |                   | Alternating Least Squares |                   |
|----------------------|-----------------------------|-------------------|---------------------------|-------------------|
|                      | NMSE                        | Time (s)          | NMSE                      | Time (s)          |
| 0.01                 | $0.989 \pm 0.002$           | $0.348 \pm 0.016$ | $1.000 \pm 0.000$         | $0.067 \pm 0.001$ |
| 0.1                  | $0.457 \pm 0.023$           | $62.4 \pm 4.79$   | $1.000 \pm 0.000$         | $0.105 \pm 0.001$ |
| 1                    | $0.007 \pm 0.000$           | $60.4 \pm 1.32$   | $0.389 \pm 0.023$         | $1.82 \pm 0.098$  |
| 10 ( $n = 100,000$ ) | $0.005 \pm 0.000$           | $413.7 \pm 11.1$  | $0.046 \pm 0.005$         | $15.03 \pm 0.401$ |
| Sample Percent       | Simple Low Rank TC (SiLRTC) |                   | Trace Norm & ADMM (TNCP)  |                   |
|                      | NMSE                        | Time (s)          | NMSE                      | Time (s)          |
| 0.01                 | $1.000 \pm 0.000$           | $1.20 \pm 0.055$  | $0.907 \pm 0.004$         | $0.261 \pm 0.001$ |
| 0.1                  | $1.000 \pm 0.000$           | $1.24 \pm 0.041$  | $0.893 \pm 0.003$         | $0.260 \pm 0.001$ |
| 1                    | $0.990 \pm 0.000$           | $1.67 \pm 0.053$  | $0.880 \pm 0.003$         | $0.266 \pm 0.001$ |
| 10 ( $n = 100,000$ ) | $0.862 \pm 0.001$           | $4.23 \pm 0.141$  | $0.800 \pm 0.003$         | $0.264 \pm 0.001$ |

Table 4: Results for nonnegative tensors with size  $10^{7}$  and increasing  $n$  samples

| Sample Percent         | BCG with Weak Oracle        |                 | Alternating Least Squares |                   |
|------------------------|-----------------------------|-----------------|---------------------------|-------------------|
|                        | NMSE                        | Time (s)        | NMSE                      | Time (s)          |
| 0.01                   | $0.873 \pm 0.016$           | $48.4 \pm 3.42$ | $1.000 \pm 0.000$         | $0.561 \pm 0.003$ |
| 0.1                    | $0.029 \pm 0.004$           | $145 \pm 36.6$  | $0.877 \pm 0.023$         | $1.29 \pm 0.043$  |
| 1                      | $0.011 \pm 0.001$           | $522 \pm 11.7$  | $0.220 \pm 0.016$         | $19.2 \pm 0.603$  |
| 10 ( $n = 1,000,000$ ) | $0.013 \pm 0.001$           | $5623 \pm 381$  | $0.052 \pm 0.007$         | $189 \pm 4.89$    |
| Sample Percent         | Simple Low Rank TC (SiLRTC) |                 | Trace Norm & ADMM (TNCP)  |                   |
|                        | NMSE                        | Time (s)        | NMSE                      | Time (s)          |
| 0.01                   | $1.000 \pm 0.000$           | $48.3 \pm 7.95$ | $0.950 \pm 0.002$         | $6.41 \pm 0.152$  |
| 0.1                    | $1.000 \pm 0.000$           | $42.4 \pm 1.46$ | $0.938 \pm 0.002$         | $5.55 \pm 0.007$  |
| 1                      | $0.989 \pm 0.000$           | $53.9 \pm 1.96$ | $0.933 \pm 0.002$         | $5.57 \pm 0.007$  |
| 10 ( $n = 1,000,000$ ) | $0.863 \pm 0.001$           | $106 \pm 3.44$  | $0.853 \pm 0.002$         | $5.65 \pm 0.013$  |
